# Supplementary material for: A Distinctive Human Metabolomics Alteration Associated with Osteopenic and Osteoporotic Patients
Source: MDPI journal article supplement (doi:10.3390/metabo11090628), 2021-09-16
Supplement: s1 [file s1]

# Supplementary Figures

**(A)**

All  
entities  
(n=652)

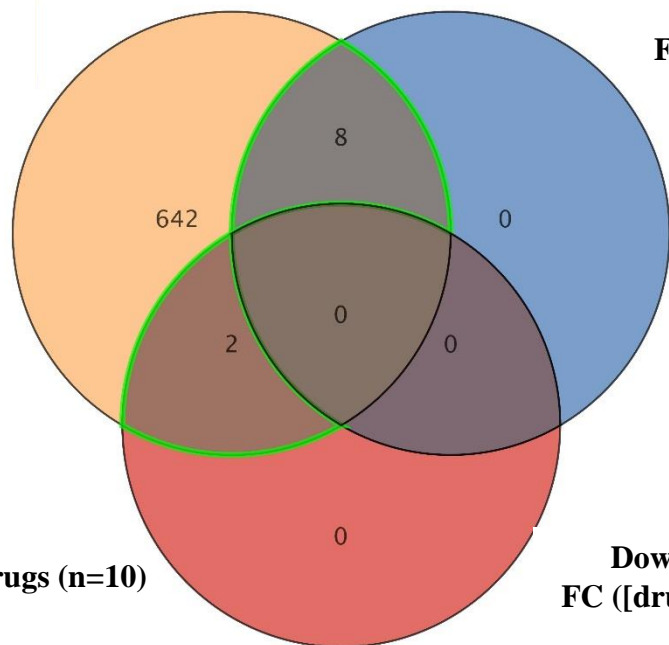

Upregulated  
FC ([drug] vs [ndrug])  
n=8

Anti-diabetic drugs (n=10)

Downregulated  
FC ([drug] vs [ndrug])  
n=2

**(C)**

All entities  
(n=652)

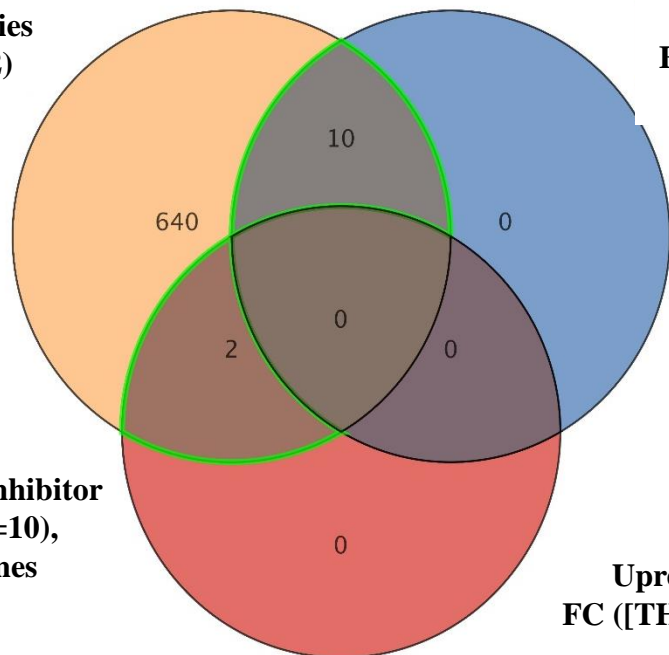

Upregulated  
FC ([PPI] vs [nPPI])  
n=10

proton pump inhibitor  
(PPI) drugs (n=10),  
thyroid hormones  
drug (n=2)

Upregulated  
FC ([TH] vs [nTH])  
n=2

**(B)**

All entities  
(n=652)

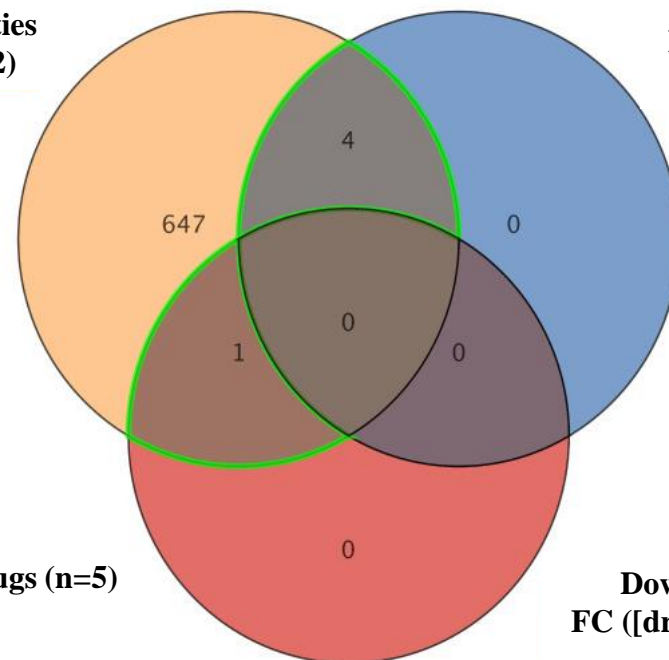

Upregulated  
FC ([drug] vs [ndrug])  
n=4

Anti-hypertensive drugs (n=5)

Downregulated  
FC ([drug] vs [ndrug])  
n=1

**(D)**

All entities  
(n=652)

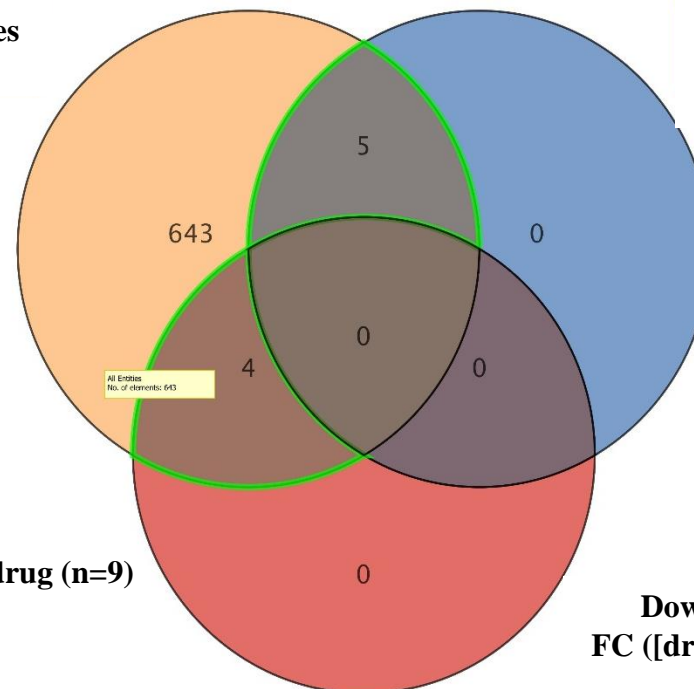

Upregulated  
FC ([drug] vs [ndrug])  
n=5

Anti-hyperlipidemic drug (n=9)

Downregulated  
FC ([drug] vs [ndrug])  
n=4

**(E)**

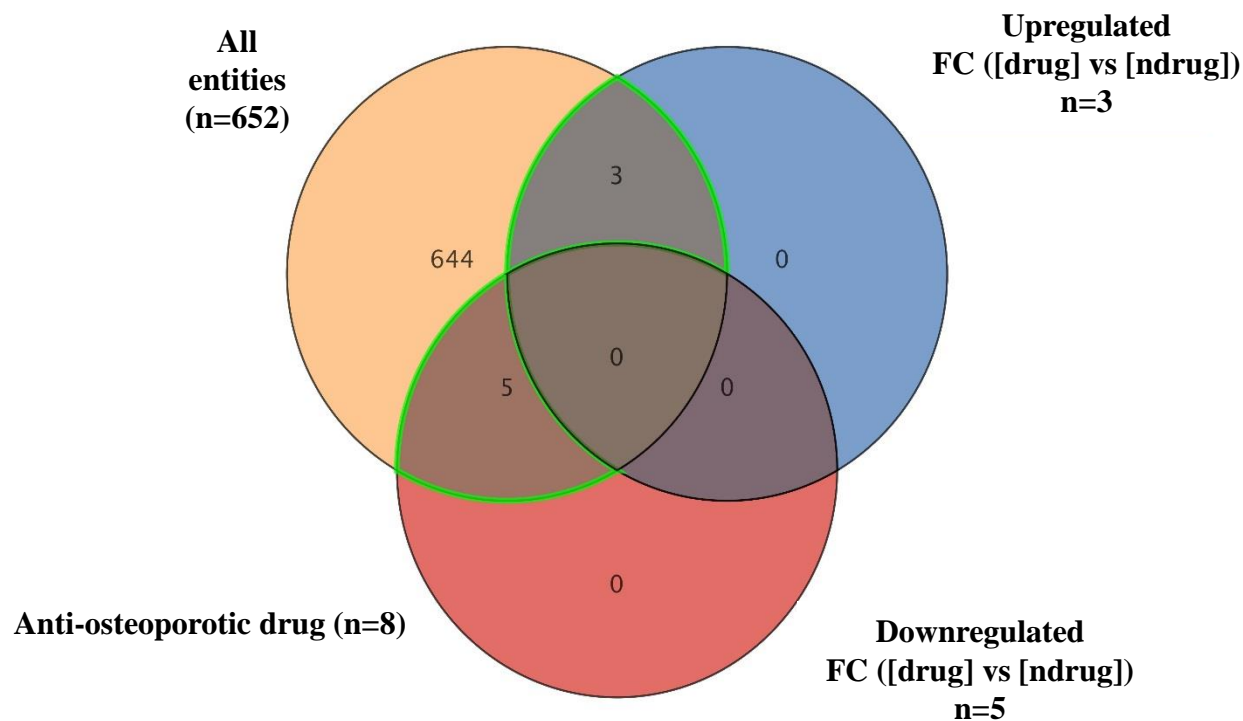

**Supplementary Figure S1 : Determination of drug-related metabolites (drug-dependent ) from the overall detected metabolites**

The panels (A-E) show Venn diagrams analysis to detect the dysregulated metabolites as an effect of different drugs intake, using moderate t-test and considering fold change (FC 1.5) and p-value <0.05. (A) Metabolites dysregulated (n=10) as an effect of anti-diabetic drugs ( 8 upregulated and 2 downregulated), (B) Metabolites dysregulated (n=5) as an effect of anti-hypertensive drugs ( 4 upregulated and 1 downregulated), (C) Metabolites dysregulated as an effect of proton pump inhibitor (PPI) drugs (n=10) and thyroid hormones drugs (n=2), all were upregulated, (D) Metabolites dysregulated (n=9) as an effect of anti-hyperlipidemic (statin) drug ( 5 upregulated and 4 downregulated) (E) Metabolites dysregulated (n=8) as an effect of anti-osteoporotic drug ( 3 upregulated and 5 downregulated)

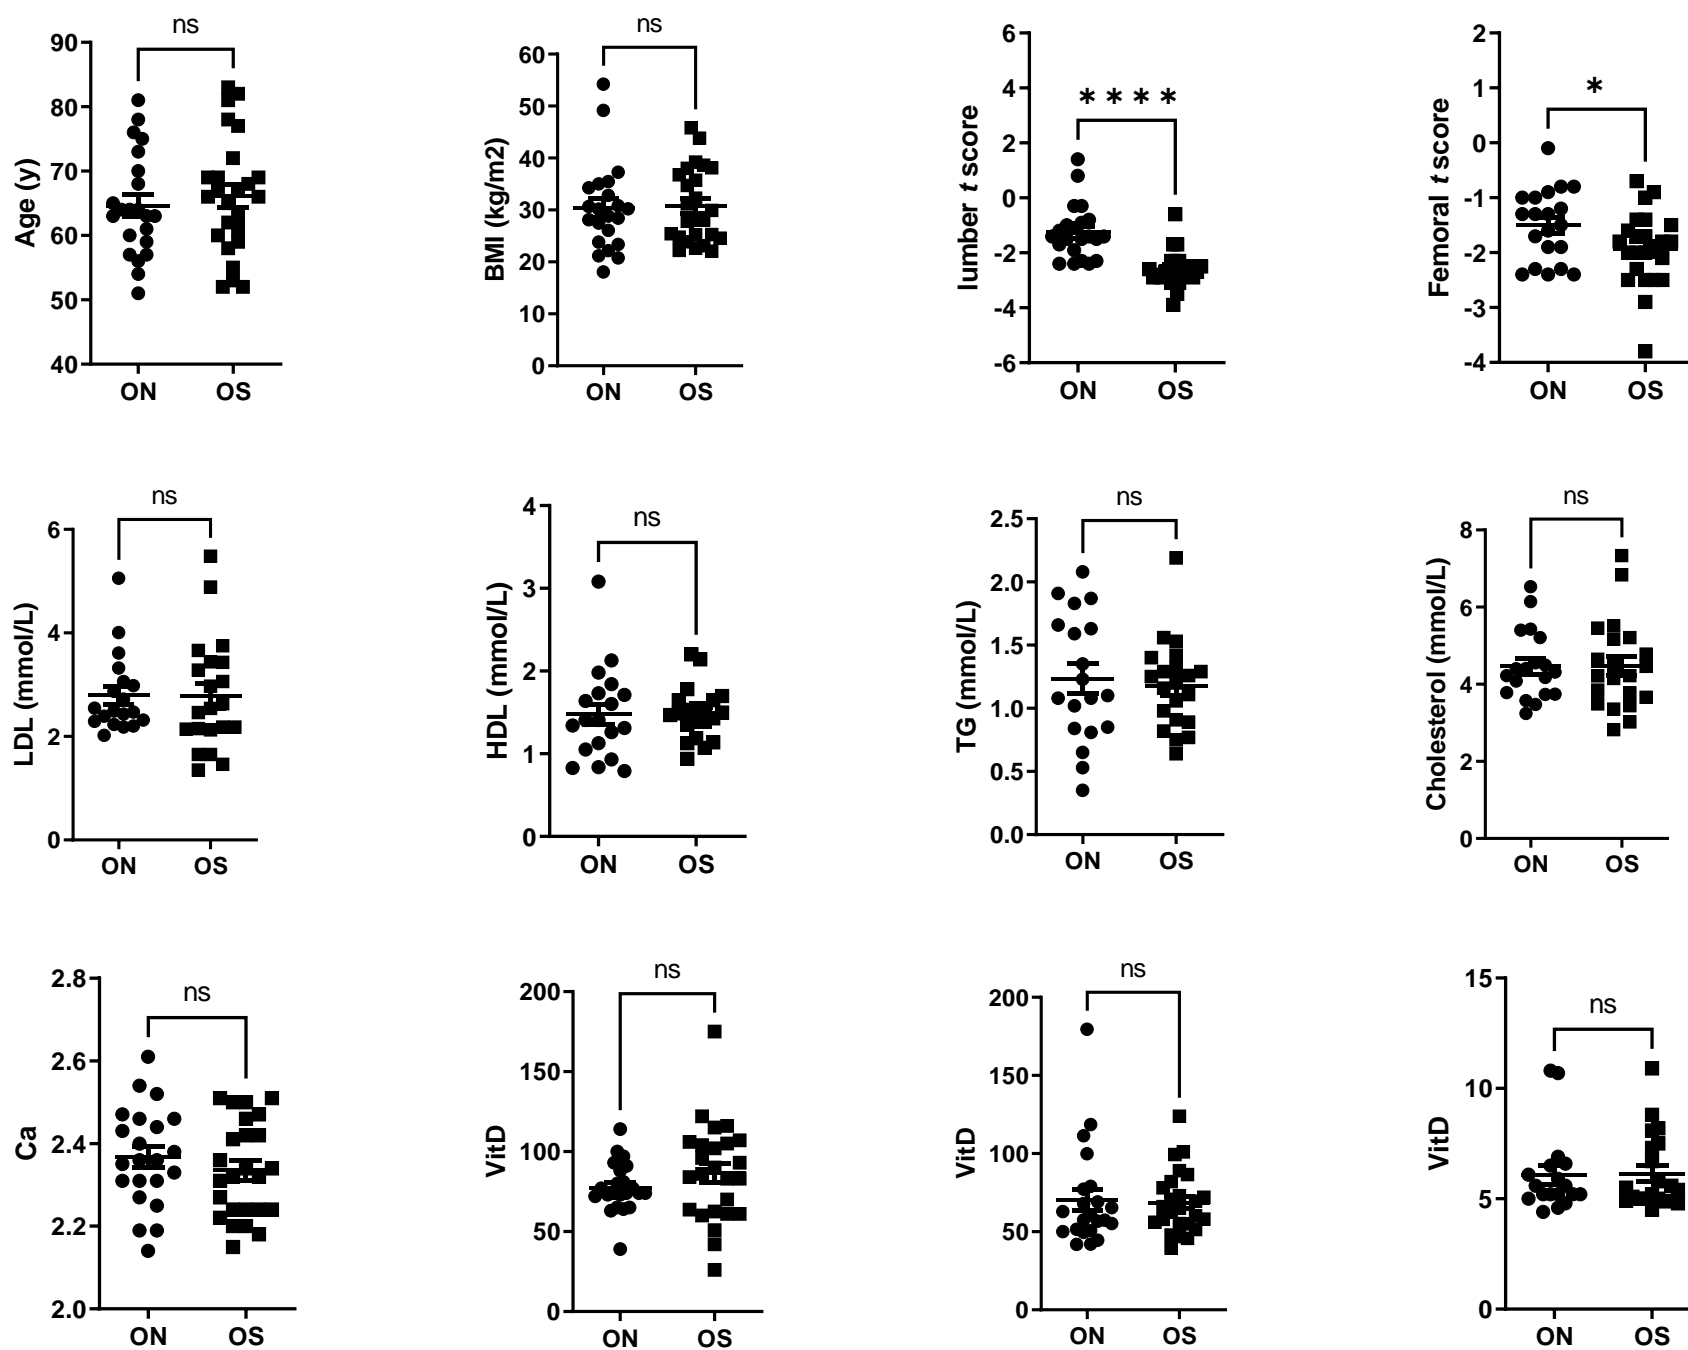

**Supplementary Figure S2:** Comparisons of clinical characteristics and demographic data between ON and OP groups.
