# Supplementary material for: A Distinctive Human Metabolomics Alteration Associated with Osteopenic and Osteoporotic Patients
Source: MDPI journal article supplement (doi:10.3390/metabo11090628), 2021-09-16
Supplement: s1 [file s1]

Supplementary Table S1: List of the dysregulated metabolites (11 Up- and 24 down- regulated in ON compared to OP)

| ID   | RT [min] | Compound name         | HMDB ID     | Formula     | Molecular weight (g/mole) | Monoisotopic Mass | m/z error (ppm) | ESI charge | log2(FC)     | -log10(P) |
|------|----------|-----------------------|-------------|-------------|---------------------------|-------------------|-----------------|------------|--------------|-----------|
| 2968 | 10.127   | PC(16:0/18:1)         | HMDB0007972 | C42H82NO8P  | 759.5779                  | 759.5778          | 4               | +          | -1.851       | 4.766     |
| 3052 | 10.163   | PC(22:2/14:0)         | HMDB0008590 | C44H84NO8P  | 785.5953                  | 785.5935          | 2               | +          | -1.844       | 5.8912    |
| 2953 | 10.164   | PC(20:1/14:1)         | HMDB0008296 | C42H80NO8P  | 757.5645                  | 757.5622          | 3               | +          | -1.7254      | 2.8554    |
| 81   | 2.798    | Epsilon-caprolactam   | HMDB0062769 | C6H11NO     | 113.0847                  | 113.0841          | 6               | +          | -1.4331      | 2.8508    |
| 2914 | 10.619   | SM(d18:0/18:1)        | HMDB0012089 | C41H83N2O6P | 730.6006                  | 730.5989          | 2               | +          | -1.4183      | 2.301     |
| 3109 | 10.762   | PC(16:0/22:6)         | HMDB0007991 | C46H80NO8P  | 805.5629                  | 805.5622          | 1               | +          | -1.399       | 1.5414    |
| 759  | 6.684    | Tetradecanedioic acid | HMDB0000872 | C14H26O4    | 258.1824                  | 258.1831          | 3               | -          | -1.3877      | 1.6204    |
| 2857 | 10.785   | SM(d18:1/16:1)        | HMDB0240613 | C39H77N2O6P | 700.5538                  | 700.5519          | 3               | +          | -1.2828      | 1.6563    |
| 3148 | 10.619   | PC(18:0/20:3)         | HMDB0008046 | C46H86NO8P  | 811.6102                  | 811.6091          | 1               | +          | -1.2724      | 5.7782    |
| 1663 | 10.164   | S-Adenosylmethionine  | HMDB0001185 | C15H23N6O5S | 399.1386                  | 399.1451          | 16              | -          | -1.2273      | 5.0956    |
| 3063 | 10.163   | PC(18:1/18:0)         | HMDB0008102 | C44H86NO8P  | 787.6082                  | 787.6091          | 1               | +          | -1.2141      | 3.749     |
| 3040 | 10.761   | PC(18:1/18:2)         | HMDB0008105 | C44H82NO8P  | 783.5792                  | 783.5778          | 2               | +          | -1.146       | 1.7579    |
| 3133 | 10.162   | PC(20:4/18:0)         | HMDB0008464 | C46H84NO8P  | 809.5948                  | 809.5935          | 2               | +          | -1.0602      | 3.147     |
| 3175 | 10.752   | PC(18:1/22:6)         | HMDB0008123 | C48H82NO8P  | 831.5773                  | 831.5778          | 1               | +          | -<br>0.96515 | 1.9995    |
| 1550 | 10.165   | Ecabet                | HMDB0015613 | C20H28O5S   | 380.1647                  | 380.1657          | 3               | -          | -<br>0.93329 | 5.6191    |
| 925  | 10.752   | Vaccenic acid         | HMDB0003231 | C18H34O2    | 282.2552                  | 282.2559          | 3               | -          | -<br>0.91683 | 2.206     |
| 2810 | 10.164   | SM(d18:1/14:0)        | HMDB0012097 | C37H75N2O6P | 674.538                   | 674.5363          | 3               | +          | -<br>0.85045 | 2.5723    |
| 1453 | 9.14     | N-arachidonoylglycine | HMDB0005096 | C22H35NO3   | 361.2613                  | 361.2617          | 1               | -          | -<br>0.80395 | 1.4671    |
| 1236 | 9.802    | Margaroylglycine      | HMDB0013246 | C19H37NO3   | 327.2769                  | 327.2773          | 1               | -          | -<br>0.71817 | 2.1874    |
| 173  | 3.269    | Succinylacetone       | HMDB0000635 | C7H10O4     | 158.0564                  | 158.0579          | 10              | -          | -0.6816      | 1.5409    |

|      |        |                                                   |             |            |          |          |    |   |              |        |
|------|--------|---------------------------------------------------|-------------|------------|----------|----------|----|---|--------------|--------|
| 750  | 10.631 | Palmitic acid                                     | HMDB0000220 | C16H32O2   | 256.2395 | 256.2402 | 3  | - | -<br>0.64896 | 2.342  |
| 655  | 6.848  | 3-Oxotetradecanoic acid                           | HMDB0010730 | C14H26O3   | 242.1874 | 242.1882 | 3  | - | -<br>0.63426 | 1.6505 |
| 941  | 7.485  | Androstenedione                                   | HMDB0000053 | C19H26O2   | 286.2138 | 286.1933 | 15 | - | -<br>0.60945 | 1.3798 |
| 1473 | 8.412  | 5alpha-Tetrahydrocortisol                         | HMDB0000526 | C21H34O5   | 366.2373 | 366.2406 | 9  | - | -<br>0.60048 | 2.7446 |
| 411  | 1.282  | L-Acetylcarnitine                                 | HMDB0000201 | C9H17NO4   | 203.1146 | 203.1158 | 6  | - | 0.60093      | 1.6219 |
| 1657 | 5.925  | 9-Hydroperoxyoctadeca-10,12-dienoic acid          | HMDB0062434 | C18H32O4   | 312.2314 | 312.2301 | 4  | + | 0.61029      | 2.0453 |
| 752  | 1.171  | Dopa                                              | HMDB0000181 | C9H11NO4   | 197.0696 | 197.0688 | 4  | + | 0.62342      | 1.8085 |
| 1121 | 3.158  | Leucylleucine                                     | HMDB0028933 | C12H24N2O3 | 244.1797 | 244.1787 | 4  | + | 0.63125      | 2.3275 |
| 856  | 3.431  | Cyclo(leucylpropyl)                               | HMDB0034276 | C11H18N2O2 | 210.1377 | 210.1368 | 4  | + | 0.72814      | 1.5588 |
| 636  | 5.454  | 3-Carboxy-4-methyl-5-propyl-2-furanpropionic acid | HMDB0061112 | C12H16O5   | 240.0988 | 240.0998 | 4  | - | 0.91217      | 1.5211 |
| 2297 | 1.292  | Estrone glucuronide                               | HMDB0004483 | C24H30O8   | 446.1971 | 446.1941 | 7  | + | 0.91597      | 1.7793 |
| 2248 | 10.47  | alpha-Tocopherol                                  | HMDB0001893 | C29H50O2   | 430.3782 | 430.3811 | 7  | + | 1.0656       | 1.3103 |
| 2280 | 9.065  | 3-Hydroxyoctadecenoylcarnitine                    | HMDB0013339 | C25H47NO5  | 441.3468 | 441.3454 | 3  | + | 1.1093       | 1.8295 |
| 271  | 0.846  | Iditol                                            | HMDB0011632 | C6H14O6    | 182.0776 | 182.079  | 8  | - | 1.2339       | 1.4268 |
| 2161 | 4.105  | Alclometasone                                     | HMDB0014385 | C22H29ClO5 | 408.1736 | 408.1704 | 8  | + | 5.7414       | 1.6704 |
